# Supplementary material
Source: Elsevier journal article supplement (https://blog.fdik.org/2024-07/mmc2.pdf)
Supplement: mmc2 [file mmc2.pdf]

Article

# The central role of natural killer cells in mediating acute myocarditis after mRNA COVID-19 vaccination

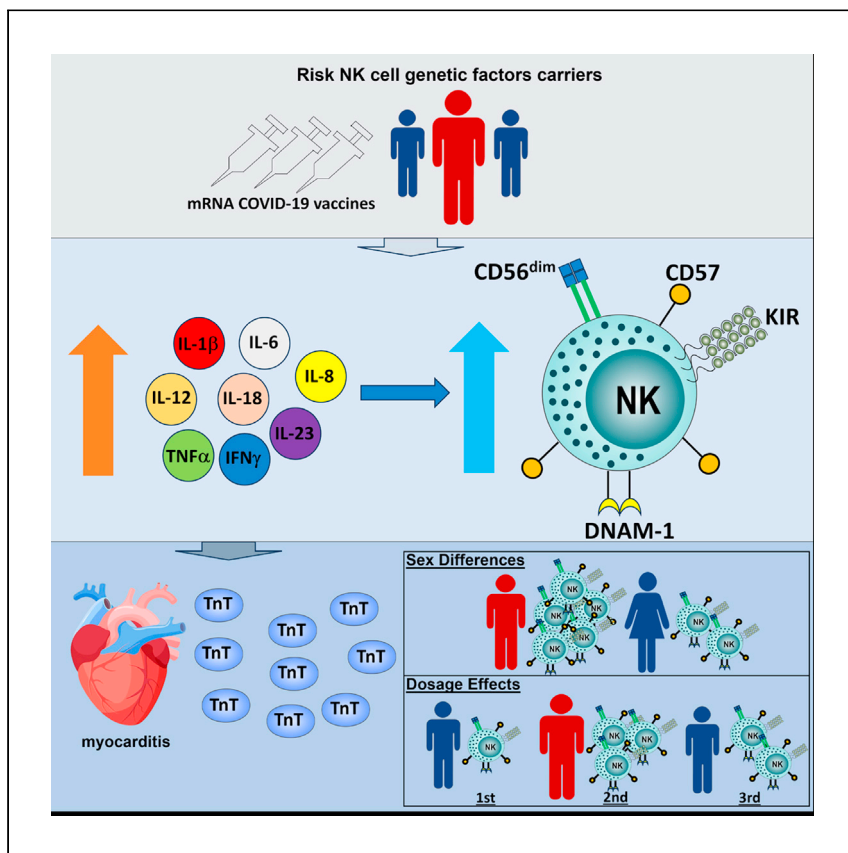

The rapid onset of acute myocarditis following mRNA COVID-19 vaccinations remains unclear. Tsang et al. examined the pathological immune response, discovering that elevated NK cell activity and related genetic mechanisms significantly contribute to adverse vaccine events and heightened risk of vaccine-related myocarditis.

Hing Wai Tsang, Mike Yat Wah Kwan, Gilbert T. Chua, ..., Ian Chi Kei Wong, Wing Hang Leung, Patrick Ip

leungwhf@hku.hk (W.H.L.)  
patricip@hku.hk (P.I.)

Highlights

Elevated serum NK-stimulatory cytokines found in vaccine-related myocarditis

CD57<sup>+</sup> NK cell abundance positively correlates with the elevated cTnT level

CD57<sup>+</sup> NK cells are more frequent in males and after second vaccine dose administration

Genetic mechanisms in NK cell activity impact vaccine-related myocarditis risk

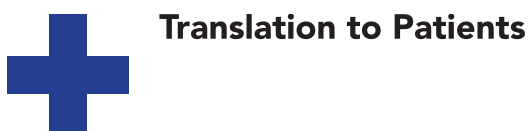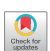

## Article

## The central role of natural killer cells in mediating acute myocarditis after mRNA COVID-19 vaccination

Hing Wai Tsang,<sup>1,8</sup> Mike Yat Wah Kwan,<sup>1,8</sup> Gilbert T. Chua,<sup>1,8</sup> Sabrina Siu Ling Tsao,<sup>1</sup> Joshua Sung Chih Wong,<sup>2</sup> Keith Tsz Suen Tung,<sup>1</sup> Godfrey Chi Fung Chan,<sup>3</sup> Kelvin Kai Wang To,<sup>4</sup> Ian Chi Kei Wong,<sup>5,6,7</sup> Wing Hang Leung,<sup>1,\*</sup> and Patrick Ip<sup>1,9,\*</sup>

## SUMMARY

**Background:** Vaccine-related acute myocarditis is recognized as a rare and specific vaccine complication following mRNA-based COVID-19 vaccinations. The precise mechanisms remain unclear. We hypothesized that natural killer (NK) cells play a central role in its pathogenesis.

**Methods:** Samples from 60 adolescents with vaccine-related myocarditis were analyzed, including pro-inflammatory cytokines, cardiac troponin T, genotyping, and immunophenotyping of the corresponding activation subsets of NK cells, monocytes, and T cells. Results were compared with samples from 10 vaccinated individuals without myocarditis and 10 healthy controls.

**Findings:** Phenotypically, high levels of serum cytokines pivotal for NK cells, including interleukin-1 $\beta$  (IL-1 $\beta$ ), interferon  $\alpha$ 2 (IFN- $\alpha$ 2), IL-12, and IFN- $\gamma$ , were observed in post-vaccination patients with myocarditis, who also had high percentage of CD57<sup>+</sup> NK cells in blood, which in turn correlated positively with elevated levels of cardiac troponin T. Abundance of the CD57<sup>+</sup> NK subset was particularly prominent in males and in those after the second dose of vaccination. Genotypically, killer cell immunoglobulin-like receptor (KIR) *KIR2DL5B(-)/KIR2DS3(+)/KIR2DS5(-)/KIR2DS4del(+)* was a risk haplotype, in addition to single-nucleotide polymorphisms related to the NK cell-specific expression quantitative trait loci *DNAM-1* and *FuT11*, which also correlated with cardiac troponin T levels in post-vaccination patients with myocarditis.

**Conclusion:** Collectively, these data suggest that NK cell activation by mRNA COVID-19 vaccine contributed to the pathogenesis of acute myocarditis in genetically and epidemiologically vulnerable subjects.

**Funding:** This work was funded by the Hong Kong Collaborative Research Fund (CRF) 2020/21 and the CRF Coronavirus and Novel Infectious Diseases Research Exercises (reference no. C7149-20G).

## INTRODUCTION

COVID-19 vaccinations are among the most effective means of protecting the population, facilitating a return to normalcy in a post-pandemic world. Vaccinations can reduce the threat of virus transmission and protect against severe disease by enhancing host immunity. The benefits provided by COVID-19 vaccines are numerous and evident. The effectiveness of the COVID-19 vaccines was demonstrated by preventing 89.1% of COVID-19-related hospitalizations, 97.4% of COVID-19-related admissions to an intensive care unit, and 99.0% of COVID-19-related deaths.<sup>1–5</sup>

## CONTEXT AND SIGNIFICANCE

Vaccine-related myocarditis, a rare yet potentially fatal side effect, is associated with mRNA COVID-19 vaccines. However, the precise immune mechanisms behind these adverse events remain unclear. Tsang et al. revealed the genetic factors and excessive stimulation of natural killer (NK) cells, a type of immune cell involved in innate immunity, accountable for the increased risk and progression of vaccine-related myocarditis. The authors also demonstrated that the unfavorable NK cell activity corresponded with known epidemiological risk factors, such as sex and vaccine dosages, highlighting the significant pathological role of NK cells in mediating the vaccine side effects. This research provides valuable insights for refining mRNA vaccines and offering targeted medical advice to communities.

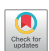

Although approved COVID-19 vaccines showed remarkable safety records, adverse side effects were more readily observed and reported due to mass vaccination programs in many countries. Acute myocarditis, in particular, is recognized as a rare and specific complication following mRNA-based COVID-19 vaccinations.<sup>6–8</sup>

One of the earliest epidemiological studies on the BNT162b2 vaccine published by our group found that the incidence of acute myocarditis among adolescents was 18.52 per 100,000 persons in Hong Kong after receiving the first two doses of the BNT162b2 vaccine 3 weeks apart.<sup>9</sup> In contrast, the observed incidence rate of acute myocarditis after the second dose of vaccine was much lower in the United States at 4.06 per 100,000.<sup>10</sup> However, these studies were unable to establish a biological explanation regarding this rare side effect following COVID-19 vaccination.

At present, the exact pathogenic mechanism of acute myocarditis following mRNA COVID-19 vaccination is still unclear, but it has been widely speculated that a dysregulated host immune response to the vaccine and its components, such as an exaggerated inflammatory response to the molecular mimicry between the encoded antigen present in the vaccine and self-antigens,<sup>2,11</sup> may contribute to this adverse event.<sup>12</sup> In this study, we aimed to investigate further the immune mechanisms of post-mRNA vaccination myocarditis, leading to a central hypothesis that natural killer (NK) cells played a key role in its pathogenesis, compatible with the previous observations that NK cells could be activated by mRNA vaccination.<sup>13–15</sup>

## RESULTS

### Subject recruitment and demographics

Sixty adolescents, aged between 12 and 17 years, with good past health who were diagnosed with acute myocarditis between July 2021 and June 2022 after a median of 3 days following BNT162b2 COVID-19 vaccination were recruited during their hospitalization at one of the public hospitals in Hong Kong SAR (Hong Kong Children's Hospital, Kwong Wah Hospital, Princess Margaret Hospital, Pamela Youde Nethersole Eastern Hospital, Queen Mary Hospital, and Tuen Mun Hospital). The demographics and clinical characteristics of these patients are shown in [Table 1](#). There were 50 male patients (83.3%) and 10 female patients (16.7%) with median ages of 15.0 and 13.0, respectively. All subjects were ethnic Han Chinese, and the majority (70.0%) presented with acute myocarditis after receiving their second dose of the vaccine. Among the 60 patients, 18 (30.0%) required intensive care during hospitalization. The majority of patients exhibited chest pain (88.3%). Twenty-three patients (38.8%) presented with fever, while 21 (35.0%) experienced palpitations. Abnormal electrocardiograms (ECGs) were observed in 48 (80.0%) cases, with 22 (36.7%) having abnormal echocardiograms and 42 (70.0%) presenting abnormal cardiac magnetic resonance imaging. No significant arrhythmias or identifiable infections were detected. Biochemical testing showed elevated serum cardiac troponin T (cTnT) concentrations in patients when compared to the vaccinated non-myocarditis control group ( $p < 0.0001$ ). All patients displayed mild symptoms that either required no treatment or were alleviated through the use of non-steroidal anti-inflammatory drugs. Spontaneous recovery occurred without the necessity for systemic steroids, intravenous immunoglobulins, intubation, inotropic support, or ventricular assist devices.

Ten age-matched Han Chinese patients (6 males and 4 females; median age = 14.5 years, range = 11–16 years), who presented with various non-cardiovascular-related complaints after a median of 5 days following BNT162b2 COVID-19 vaccination, were recruited as non-myocarditis vaccinated controls ([Table S1](#)). Of the recruited patient controls, four (40.0%) reported chest pain, 1 (10.0%) presented with fever,

<sup>1</sup>Department of Paediatrics and Adolescent Medicine, Li Ka Shing Faculty of Medicine, School of Clinical Medicine, The University of Hong Kong, Hong Kong SAR, China

<sup>2</sup>Department of Paediatrics and Adolescent Medicine, Princess Margaret Hospital Authority, Hong Kong SAR, China

<sup>3</sup>Paediatric Haematology & Oncology Centre, Hong Kong Sanatorium & Hospital, Hong Kong SAR, China

<sup>4</sup>Department of Microbiology, Li Ka Shing Faculty of Medicine, School of Clinical Medicine, The University of Hong Kong, Hong Kong SAR, China

<sup>5</sup>Department of Pharmacology and Pharmacy, Li Ka Shing Faculty of Medicine, The University of Hong Kong, Hong Kong SAR, China

<sup>6</sup>School of Pharmacy, Medical Sciences Division, Macau University of Science and Technology, Macau SAR, China

<sup>7</sup>School of Pharmacy, Aston University, Birmingham B4 7ET, England

<sup>8</sup>These authors contributed equally

<sup>9</sup>Lead contact

\*Correspondence: [leungwhf@hku.hk](mailto:leungwhf@hku.hk) (W.H.L.), [patricip@hku.hk](mailto:patricip@hku.hk) (P.I.)

<https://doi.org/10.1016/j.medj.2024.02.008>

**Table 1. Demographics and clinical characteristics of the mRNA COVID-19-vaccinated patients with acute myocarditis and controls**

|                                                                            | Post-vaccination patients with myocarditis (n = 60) | Non-myocarditis vaccinated control (n = 10) | Non-vaccinated control (n = 10) |
|----------------------------------------------------------------------------|-----------------------------------------------------|---------------------------------------------|---------------------------------|
| Median age in years                                                        | 15                                                  | 14.5                                        | 14                              |
| Age range                                                                  | 12–17                                               | 11–16                                       | 12–16                           |
| <b>Gender (%) / median age</b>                                             |                                                     |                                             |                                 |
| Male                                                                       | 83.3 (50/60)/15                                     | 60.0 (6/10)/15                              | 50.0 (5/10)/14                  |
| Female                                                                     | 16.7 (10/60)/13                                     | 40.0 (4/10)/13.5                            | 50.0 (5/10)/14                  |
| <b>Ethnicity (%)</b>                                                       |                                                     |                                             |                                 |
| Han Chinese                                                                | 100 (60/60)                                         | 100 (10/10)                                 | 100 (10/10)                     |
| Others                                                                     | 0                                                   | 0                                           | 0                               |
| Median days of hospital admission from the last dose / range               | 2 (1–14)                                            | 5 (1–14)                                    | N/A                             |
| <b>Dose(s) of mRNA COVID-19 vaccine received before symptoms onset (%)</b> |                                                     |                                             |                                 |
| First dose                                                                 | 15.0 (9/60)                                         | 10.0 (1/10)                                 | N/A                             |
| Second dose                                                                | 70.0 (42/60)                                        | 80.0 (8/10)                                 | N/A                             |
| Third dose                                                                 | 15.0 (9/60)                                         | 10.0 (1/10)                                 | N/A                             |
| Admission to intensive care unit (%)                                       | 30.0 (18/60)                                        | 0 (0/10)                                    | N/A                             |
| Average serum cardiac troponin T concentration (ng/mL) (mean ± SD)         | 0.62 ± 0.40***                                      | 0.015 ± 0.0004                              | N/A                             |
| <b>Signs/symptoms (%)</b>                                                  |                                                     |                                             |                                 |
| Chest pain                                                                 | 88.3 (53/60)                                        | 40.0 (4/10)                                 | N/A                             |
| Fever                                                                      | 38.8 (23/60)                                        | 10.0 (1/10)                                 | N/A                             |
| Palpitation                                                                | 35.0 (21/60)                                        | 20.0 (2/10)                                 | N/A                             |
| <b>Medical checkup (%)</b>                                                 |                                                     |                                             |                                 |
| Abnormal electrocardiogram (ECG)                                           | 80.0 (48/60)                                        | 0 (0/8)                                     | N/A                             |
| Abnormal echocardiogram                                                    | 36.7 (22/60)                                        | 0 (0/8)                                     | N/A                             |
| Abnormal cardiac magnetic resonance imaging (cMRI)                         | 70.0 (42/60)                                        | N/A                                         | N/A                             |
| Sample collection period                                                   | July 2021 to June 2022                              | July 2021 to June 2022                      | April 2021 to June 2021         |

\*\*\*p < 0.001

and 2 (20.0%) experienced palpitations. Two participants opted out of ECG and echocardiogram tests during their initial medical consultations, as they did not display any cardiac symptoms. None of the non-vaccinated control patients exhibited cardiac abnormalities, including abnormal ECGs, echocardiograms, or elevated serum cTnT levels; these findings suggest that the recruited control patients exhibited a normal host response to the BNT162b2 vaccine without experiencing adverse cardiac events. A second control group included ten age-matched healthy Han Chinese adolescents (5 males and 5 females; median age = 14.0 years, range = 12–16 years) recruited from the community who had not received any COVID-19 vaccination.

### Hypercytokinemia observed in BNT162b2-vaccinated patients with acute myocarditis

When compared to healthy controls, patients with or without myocarditis had elevated levels of a broad array of blood cytokines in general, including interferon  $\gamma$  (IFN- $\gamma$ ), interleukin-6 (IL-6), IL-12, IL-17, IL-18, IL-23, and IL-33 (all p < 0.012), with levels uniformly more elevated in patients with myocarditis than in non-myocarditis patients (all p < 0.04) (Table 2). In contrast, certain cytokines, including IL-1 $\beta$ , IFN- $\alpha$ 2, and IL-8, were significantly elevated (all p < 0.005) only among patients with myocarditis but not in patients without myocarditis (all p > 0.1). Furthermore, all 3 cytokines were elevated by more than 5-fold among patients with myocarditis compared to healthy controls. This constellation prompted us to hypothesize that NK cells played a central role in the pathogenesis of post-vaccination myocarditis, given that IL-1 $\beta$  co-stimulates human NK cells with

**Table 2. Pro-inflammatory cytokine levels in controls and patients presenting with acute myocarditis after BNT162b2 COVID-19 vaccination**

| Cytokines                       | Mean $\pm$ SD       | p value |
|---------------------------------|---------------------|---------|
| <b>IL-1<math>\beta</math></b>   |                     |         |
| Non-vaccinated                  | 6.86 $\pm$ 9.66     | 0.3639  |
| Vaccinated controls             | 12.64 $\pm$ 17.00   | –       |
| Patients                        | 97.36 $\pm$ 127.28  | <0.0001 |
| <b>IFN-<math>\alpha</math>2</b> |                     |         |
| Non-vaccinated                  | 2.70 $\pm$ 2.67     | 0.1012  |
| Vaccinated controls             | 7.31 $\pm$ 7.70     | –       |
| Patients                        | 19.22 $\pm$ 23.80   | 0.004   |
| <b>IFN-<math>\gamma</math></b>  |                     |         |
| Non-vaccinated                  | 3.31 $\pm$ 2.88     | 0.0093  |
| Vaccinated controls             | 17.80 $\pm$ 13.98   | –       |
| Patients                        | 37.78 $\pm$ 45.94   | 0.001   |
| <b>TNF-<math>\alpha</math></b>  |                     |         |
| Non-vaccinated                  | 7.22 $\pm$ 13.31    | 0.0211  |
| Vaccinated controls             | 45.35 $\pm$ 42.82   | –       |
| Patients                        | 121.15 $\pm$ 364.46 | 0.13    |
| <b>MCP-1</b>                    |                     |         |
| Non-vaccinated                  | 119.30 $\pm$ 59.76  | 0.0928  |
| Vaccinated controls             | 188.57 $\pm$ 105.73 | –       |
| Patients                        | 200.52 $\pm$ 104.54 | 0.75    |
| <b>IL-6</b>                     |                     |         |
| Non-vaccinated                  | 3.43 $\pm$ 1.30     | 0.0016  |
| Vaccinated controls             | 9.96 $\pm$ 4.65     | –       |
| Patients                        | 24.83 $\pm$ 32.81   | 0.002   |
| <b>IL-8</b>                     |                     |         |
| Non-vaccinated                  | 37.89 $\pm$ 42.42   | 0.78    |
| Vaccinated controls             | 53.05 $\pm$ 54.28   | –       |
| Patients                        | 193.98 $\pm$ 345.99 | 0.004   |
| <b>IL-12</b>                    |                     |         |
| Non-vaccinated                  | 1.7416 $\pm$ 1.10   | 0.0011  |
| Vaccinated controls             | 6.60 $\pm$ 3.35     | –       |
| Patients                        | 18.71 $\pm$ 23.81   | <0.0001 |
| <b>IL-17</b>                    |                     |         |
| Non-vaccinated                  | 0.80 $\pm$ 0.80     | <0.0001 |
| Vaccinated controls             | 2.34 $\pm$ 0.49     | –       |
| Patients                        | 5.93 $\pm$ 6.21     | <0.0001 |
| <b>IL-18</b>                    |                     |         |
| Non-vaccinated                  | 104.86 $\pm$ 94.65  | <0.0001 |
| Vaccinated controls             | 405.78 $\pm$ 123.81 | –       |
| Patients                        | 521.33 $\pm$ 283.07 | 0.039   |
| <b>IL-23</b>                    |                     |         |
| Non-vaccinated                  | 4.19 $\pm$ 3.96     | 0.0022  |
| Vaccinated controls             | 17.24 $\pm$ 9.90    | –       |
| Patients                        | 41.27 $\pm$ 67.07   | 0.01    |
| <b>IL-33</b>                    |                     |         |
| Non-vaccinated                  | 11.28 $\pm$ 8.96    | 0.0114  |
| Vaccinated controls             | 194.66 $\pm$ 182.93 | –       |
| Patients                        | 492.93 $\pm$ 609.05 | 0.004   |

Data are not shown for IL-10 levels, which were not statistically significant among the 3 groups.

IL-12,<sup>16</sup> IFN- $\alpha$ 2 can protect these activated NK cells against fratricide,<sup>17</sup> and IL-8 is required for maximum IFN- $\gamma$  production.<sup>18</sup>

### CD57<sup>+</sup> NK cell subset expanded in patients with acute myocarditis

To test this hypothesis, we first examined whether activated NK cells were preferentially expanded in patients with myocarditis in comparison to activated monocytes and activated T cells. By flow cytometry, the activated CD57<sup>+</sup> NK cell subset was found to be more prevalent in the blood of patients with myocarditis ( $p = 0.0131$ ) (Figures 1Bi and 1C), the frequency of which correlated positively with the serum level of cardiac troponin T ( $p = 0.03$ ) (Figure 1Ei). In contrast, the frequency of the activated human leukocytic antigen-DR isotype+ (HLA-DR+) monocyte subset was not different statistically (Figures 1Bii and 1C) and did not correlate with the serum level of cardiac troponin T (Figure 1Eii). Overall, both total activated innate cells and activated CD69<sup>+</sup> T cell percentages were higher in patients with myocarditis compared to non-myocarditis vaccinated controls (Figures 1Biii and 1Dii). Taken together, these data suggested that the induction of early activated CD69<sup>+</sup> T cells in patients with myocarditis within a few days after BNT162b2 vaccination were driven primarily by activated innate NK cells rather than monocytes.

### Identification of killer cell immunoglobulin-like receptors (KIR) genotypes that protect against or increase the risk of developing myocarditis in BNT162b2-vaccinated adolescents

As KIR polymorphism is a key genetic determinant of NK cell activity in health and diseases,<sup>19</sup> we performed KIR genotyping to determine if there is any genetic predisposition for the NK cell hyperactivation observed after vaccination in our patients with myocarditis (Table 3). We found a negative association between the development of post-vaccination myocarditis and *KIR2DL5B* (odds ratio [OR] = 0.14; 95% confidence interval [CI] = 0.0317–0.6442;  $p = 0.0113$ ) and *KIR2DS5* (OR = 0.18; 95% CI = 0.0414–0.7436;  $p = 0.0182$ ). In contrast, *KIR2DS3* (OR = 8.83; 95% CI = 0.4844–160.8316) was exclusively observed in patients with myocarditis, whereas *KIR2DS4del* (OR = 5.13; 95% CI = 1.164–22.638;  $p = 0.0307$ ) was more commonly observed in patients with myocarditis than in non-myocarditis vaccinated controls. These findings showed that there were protective and vulnerable KIR genotypes associated with acute myocarditis post-BNT162b2 vaccination.

### Genetic association of NK-specific eQTLs to myocarditis in BNT162b2-vaccinated adolescents

Other than KIR polymorphisms, recent studies have identified subsets of genes with expression quantitative trait loci (eQTLs) specific to NK cells that are highly informative of autoimmunity.<sup>20</sup> Therefore, we investigated the associations of five of these documented regulatory variants of NK cells with the measured cTnT levels in patients with myocarditis (Figure 2). A higher prevalence of minor alleles was observed for all variants tested in patients with myocarditis compared to non-myocarditis vaccinated controls except for rs11000765 (Figure 2Ai). Furthermore, there was a dose-dependent increase in the serum cTnT level in patients carrying the rs1788098-T allele of CD226 (Figure 2Bii) and a significantly higher serum cTnT level ( $p = 0.0475$ ) in patients carrying the rs11000765 heterozygous GC of FUT11 (Figure 2Biv). We used a genetic score to estimate the combined genetic effects on the vaccine-associated myocarditis in patients carrying the affected alleles, followed by a comparative analysis of their average cTnT levels. There were significantly higher cTnT levels ( $p = 0.0294$ ) in patients with higher genetic scores (Figure 2C), which suggests that eQTLs specific to NK cells are genetic determinants of post-vaccination acute myocarditis in adolescent patients.

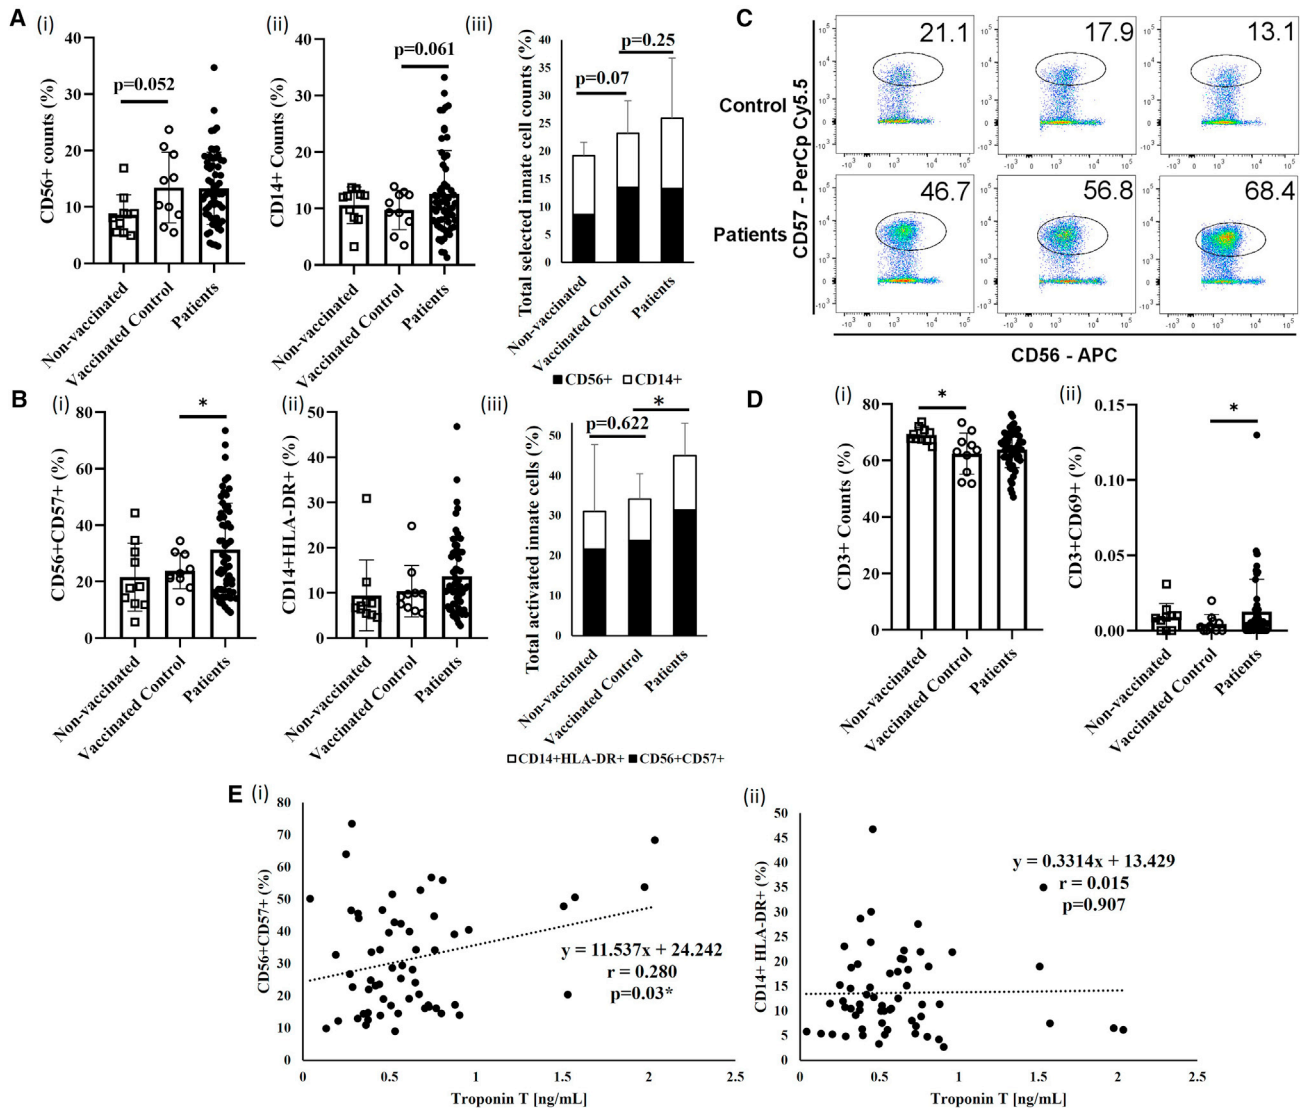

**Figure 1. Quantitative and qualitative comparison of NK cells, monocytes, and T cells in non-vaccinated healthy controls, vaccinated non-myocarditis controls, and vaccinated patients with acute myocarditis**

(A) Quantification of NK cells (i), monocytes (ii), and total innate cell counts (iii) in stack columns representing the summation of NK cells and monocytes in 60 patients with acute myocarditis, 10 healthy non-vaccinated individuals, and 10 vaccinated controls. Data are presented as mean  $\pm$  SD and were analyzed using a two-sided Student's t test between control and patient groups.  $*p < 0.05$ .

(B) NK cell (i), monocyte (ii), and total selected innate cell (iii) responses after mRNA COVID-19 vaccination in patients with acute myocarditis and controls. Data are presented as mean  $\pm$  SD and were analyzed using a two-sided Student's t test between control and patient groups.  $*p < 0.05$ .

(C) Representative data of NK cell activation after mRNA COVID-19 vaccination in patients with acute myocarditis and controls. Data are presented as mean  $\pm$  SD and were analyzed using a two-sided Student's t test between control and patient groups.  $*p < 0.05$ .

(D) Qualification of T cells (i) and T cell CD69<sup>+</sup> subset (ii) in patients with acute myocarditis and vaccinated controls. Data are presented as mean  $\pm$  SD and were analyzed using a two-sided Student's t test between control and patient groups.  $*p < 0.05$ .

(E) Regression analysis of the measured CD56<sup>+</sup> NK cells (i) and CD14<sup>+</sup> monocyte activations (ii) plotted against serum cTnT levels in patients. The best-fit trendline is shown.  $*p < 0.05$ .

### CD57<sup>+</sup>-activated NK cells associated with prevalent epidemiological risk factors in vulnerable individuals

Given that vaccine-associated myocarditis was more common and severe in males than in females, we next assessed the gender differences in activated CD57<sup>+</sup> NK cells, HLA-DR<sup>+</sup> monocytes, and CD69<sup>+</sup> T cells among patients with myocarditis.

**Table 3. Identification of KIR risk genes associated with post-mRNA COVID-19 vaccination myocarditis in 54 adolescent patients**

| Genes   | Patients (n = 54) (%) | Controls (n = 10) (%) | Odds ratio (95% CI)    | p value             |
|---------|-----------------------|-----------------------|------------------------|---------------------|
| 2DL1    | 100.00                | 100.00                | –                      | –                   |
| 2DL2    | 31.25                 | 20.00                 | 1.82 (0.3438–9.6140)   | 0.4817              |
| 2DL3    | 100.00                | 100.00                | –                      | –                   |
| 2DL4    | 100.00                | 100.00                | –                      | –                   |
| 2DL5A   | 22.92                 | 50.00                 | 0.30 (0.0722–1.2184)   | 0.0919              |
| 2DL5B   | 12.50                 | 50.00                 | 0.14 (0.0317–0.6442)   | 0.0113 <sup>a</sup> |
| 2DS1    | 37.50                 | 50.00                 | 0.60 (0.1524–2.3623)   | 0.465               |
| 2DS2    | 31.25                 | 20.00                 | 1.82 (0.34380–9.6140)  | 0.4817              |
| 2DS3    | 29.17                 | 0.00                  | 8.83 (0.4844–160.8316) | 0.1414              |
| 2DS4del | 68.75                 | 30.00                 | 5.13 (1.1640–22.6378)  | 0.0307 <sup>a</sup> |
| 2DS4ins | 70.83                 | 80.00                 | 0.61 (0.1143–3.2248)   | 0.5581              |
| 2DS5    | 20.83                 | 60.00                 | 0.18 (0.0414–0.7436)   | 0.0182 <sup>a</sup> |
| 3DL1    | 91.67                 | 90.00                 | 1.22 (0.1218–12.2601)  | 0.8645              |
| 3DL2    | 100.00                | 90.00                 | 1.67 (0.1552–17.8947)  | 0.6732              |
| 3DL3    | 100.00                | 100.00                | –                      | –                   |
| 3DS1    | 35.42                 | 70.00                 | 0.24 (0.0537–1.0286)   | 0.0545              |
| 2DP1    | 100.00                | 100.00                | –                      | –                   |
| 3DP1    | 100.00                | 100.00                | –                      | –                   |

<sup>a</sup>p < 0.05.

Comparative analysis in the 10 female and 50 male patients revealed that the CD57<sup>+</sup>-activated NK subset was significantly more prevalent statistically (p = 0.0197) in males than in females (Figure 3Ai) but not for monocytes (Figure 3Aii), total innate activated cells (Figure 3Aiii), or T cells (Figure 3Aiv).

Myocarditis was most commonly observed after the second dose of the BNT162b2 vaccine. Comparative analysis showed that the frequencies of CD57<sup>+</sup> NK cells were highest in patients with myocarditis who had received the second dose of vaccine, particularly in comparison with those who had received the third dose (Cohen's d = 0.8235) (Figure 3Bi). T cell measurements also revealed the highest prevalence of CD69<sup>+</sup> T cells in the patient group that received the second dose of vaccine (Cohen's d = 0.7801) when compared to the first dose group) (Figure 3Biv). However, no statistical difference was observed among the 3 groups in HLA-DR+ monocytes. Taken together, these data again suggested that the induction of myocarditis in the two main epidemiological risk groups within a few days after BNT162b2 vaccination was also driven primarily by activated innate NK cells rather than monocytes.

## DISCUSSION

In our previous epidemiology report, we detailed key clinical observations and estimated incidence rates of acute myocarditis after BNT162b2 COVID-19 vaccination.<sup>9</sup> Specifically, we found a significant increase in the risk of acute myocarditis with rapid onset (median only 2 days) following BNT162b2 vaccination among male adolescents, especially after the second dose. Herein, we further explored the underlying immune mechanisms and observed extraordinarily high levels of serum cytokines pivotal for NK cells in post-vaccination patients with myocarditis. The abundance of the CD57<sup>+</sup> NK subset, which correlated with cardiac troponin T levels, was particularly prominent in male patients and those after the second dose of vaccination. Genotypic risk groups related to *KIR* polymorphism and NK-specific eQTLs were



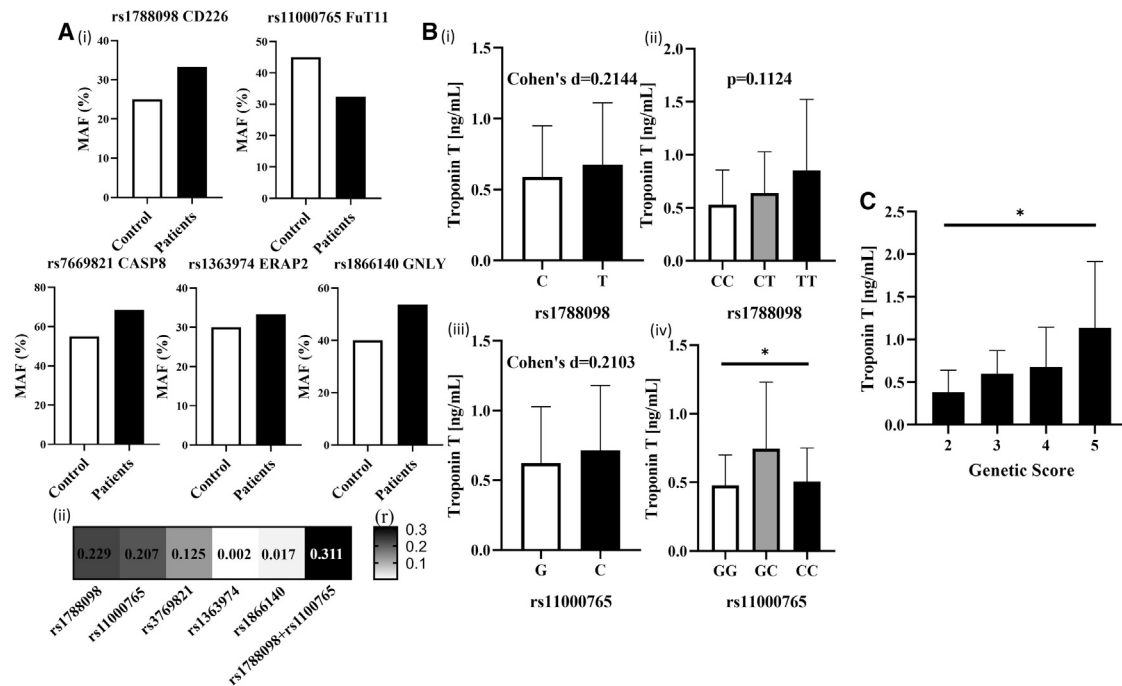

**Figure 2. Genetic association of five selected common autoimmune-related regulatory genetic polymorphisms in NK cells in mRNA COVID-19-vaccinated patients with acute myocarditis**

(A) Genetic prevalence comparison of the selected SNPs between vaccinated control and patient groups (i). Correlation analysis of the selected SNP to the serum cTnT levels in patients (ii).

(B) Comparative analysis of the serum cTnT levels in rs1788098 alleles (i) and genotypes (ii) and in rs11000765 alleles (iii) and genotypes (iv) in 54 patient carriers. Data are presented as mean  $\pm$  SD and were analyzed using Cohen's d between allele groups and one-way ANOVA between genotypes of the selected loci groups. \*p < 0.05

(C) Combined effects were assessed by the summation of genotypes in the two selected loci of patients with homozygous reference = 1, heterozygous = 2, and homozygous variants = 3 to generate the genetic score. Analysis was performed by grouping patients by their corresponding genetic score, followed by comparing serum cTnT levels between groups. Data are presented as mean  $\pm$  SD and were analyzed using one-way ANOVA between genetic score groups. \*p < 0.05.

identified. Collectively, these data strongly support the hypothesis that NK cells play a central role in the rapid onset of mRNA-vaccine-induced myocarditis.

Few studies have focused on NK cells with mRNA COVID-19 vaccinations. In terms of efficacy, the COVAXID trial on healthy individuals and immunocompromised patients showed a positive correlation between the frequency of NKG2C+ NK cells in the blood immediately before BNT162b2 vaccination and the anti-SARS-CoV-2 antibody titers following vaccination at day 35.<sup>21</sup> Similarly in hemato-oncological patients, low NK cell counts at baseline were significantly associated with poor serological response.<sup>22</sup> In terms of side effects, a single patient with myopericarditis after mRNA-1273 COVID-19 vaccination was found to have a high serum level of IL-18.<sup>23</sup> Administration of IL-18 into mice caused activation of NK cells in the hearts, similar to the findings in the corresponding patient. In this study, cytokine profiling showed that broad hypercytokinemia occurred generally in vaccinated individuals even without myocarditis (Table 2); however, their levels are much higher specifically in patients with myocarditis, including levels of IFN- $\alpha$ 2, IL-1 $\beta$ , IL-12, IL-18, and IFN- $\gamma$  that are pivotal for NK cells. In this cytokine milieu, CD57+ NK cells were prevalent, and their abundance in blood correlated positively with cardiac troponin levels. In contrast, no correlation was found for HLA-DR+ monocytes, suggesting that post-vaccination myocarditis is not a general innate hyperinflammation but a specific NK phenomenon.

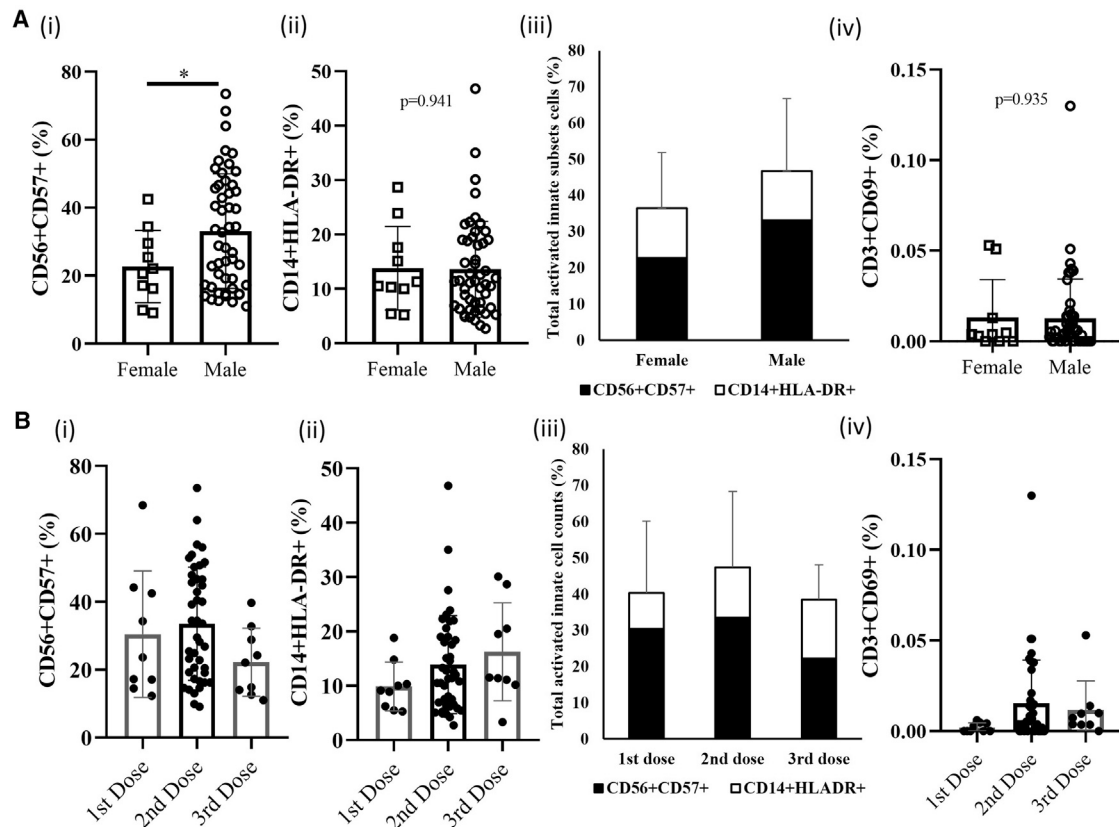

**Figure 3. Sex-specific and vaccine-dosage-specific NK cell, monocyte, and T cell responses in post-mRNA COVID-19 patients with acute myocarditis**  
 (A) NK cell (i), monocyte (ii), total selected innate cell (iii), and T cell (iv) responses in 10 acute female patients and 50 male patients after vaccination. Data are presented as mean  $\pm$  SD and were analyzed using a two-sided Student's t test between female and male groups. \* $p < 0.05$ .  
 (B) NK cell (i), monocyte (ii), total selected innate cell (iii), and T cell (iv) responses in patients diagnosed with acute myocarditis after receiving the first (9 patients), second (42 patients), and third (9 patients) doses of the mRNA COVID-19 vaccine. Data are presented as mean  $\pm$  SD with the effect size between different groups analyzed by Cohen's d.

As acute myocarditis occurred only in a small subset of vaccine recipients, we hypothesized that certain individuals may have genetic predispositions related to NK cell-specific genetic polymorphisms. In this regard, KIRs are major determinants of human NK cell activities, and KIR genes are highly polymorphic as a consequence of co-evolution with HLA. Previous studies have demonstrated strong associations with multiple autoimmune diseases.<sup>24</sup> Herein, we identified *KIR2DL5B*, *KIR2DS4del*, *KIR2DS5*, and *KIR2DS3* as statistically significant genetic determinants. Whereas *KIR2DS3* and *KIR2DS4del* were found to be risk genes, the presence of *KIR2DL5B* and *KIR2DS5* appeared to be protective. In fact, *KIR2DS3* was observed exclusively in patients with post-vaccination myocarditis. As the presence of *KIR2DS3* and *KIR2DS5* is mutually exclusive on the same haplotype,<sup>25</sup> and as *KIR2DL5B* is located in the centromeric motif, our data suggest that the centromeric risk haplotype is *KIR2DL5B(-)-KIR2DS3(+)-KIR2DS5(-)* and that the telomeric risk haplotype is *KIR2DS4del(+)*.

Other than *KIR* polymorphism, the NK cell-specific eQTLs *DNAM-1* (CD226) and *FuT11* were also known to be key determinants of NK cell activities. First, *DNAM-1* is an important co-activating receptor regulating the cytotoxic response of NK cells. It was shown that CD226+ NK cells participated in the pathogenesis of autoimmune diseases such as systemic lupus erythematosus.<sup>26</sup> Second, *FuT11*

can activate NK cells via fucosylation. *Ex-vivo*-fucosylated NK cells had enhanced effector functions as well as infiltration into lymphoma-involved organs.<sup>27</sup> The genetic-score-dependent increase in cTnT level suggests a combined effect of *DNAM-1* and *FUT11* on vaccine-induced myocarditis. The strong di-genic effects of *DNAM-1* and *FUT11* in addition to *KIR* polymorphism observed in this study indicate that post-vaccination myocarditis is likely a consequence of polygenic susceptibility. Importantly, the genetic effects of *DNAM-1* on rheumatoid arthritis were found to be more pronounced in the Chinese population than in the European population. This observation raises the possibility that the higher incidence rate of vaccine-related myocarditis in the Hong Kong population could be linked to a specific genetic mechanism exerted by NK cells. However, further investigations are needed to confirm this hypothesis.<sup>9,28</sup>

The frequency of the CD57<sup>+</sup> NK subset in the blood was particularly high in male patients with myocarditis and those after the second dose of vaccination. Hormonal factors may shape the immune system differentially between males and females.<sup>29,30</sup> Specifically, males had higher total CD56<sup>dim</sup> NK cell counts and higher expression levels of CD57.<sup>31,32</sup> In terms of vaccine dosage effect, previous reports investigating the immune response after BNT162b2 vaccination expectedly showed a much greater innate immune response after the second dose of vaccine compared to the first dose.<sup>13</sup> The reason for the lower incidence of myocarditis after the third dose is uncertain. One possibility is the longer time gap between the second and third doses of the vaccine. Another possibility is that genetically vulnerable subjects would have already developed the complication after the second dose. If not, the likelihood of developing myocarditis after the third dose would be low. More investigations will be needed to elucidate these and other possibilities.

In conclusion, our findings provide evidence supporting the central hypothesis that NK cells played a key role in the pathogenesis of rapid-onset acute myocarditis after mRNA COVID-19 vaccination. Our findings provide novel insights into the fundamental immune mechanisms for these rare, but potentially fatal, side effects. As mRNA vaccines are likely to become more prevalent in the future, the current findings will also have important implications for designing improved mRNA vaccines that would have minimal NK activation effects. For those patients who have a history of post-vaccination myocarditis and are genetically susceptible, early medical advice and close monitoring may be warranted before and after receiving a similar mRNA vaccine.

### Limitation of the study

This study had several limitations. First, the patient and control groups were relatively small, mainly because of the restricted time frame for recruiting vaccinated non-myocarditis controls. All of them must fulfill stringent eligibility criteria including documented cTnT levels within the normal reference values after the recent BNT162b2 vaccine and absolutely no clinical evidence of cardiac abnormalities. Second, the sample size for minority patient populations with myocarditis, such as female patients or those after the first and third doses of vaccine, was also small, which may affect the comparative analysis of immune parameters with healthy controls. Third, the amount of blood collected from the patients and controls was limited; hence, more detailed immunopathological analyses on NK subsets were not assessed. Fourth, only a single time point analysis was performed, which did not evaluate longitudinally other BNT162b2 mRNA COVID-19 vaccine side effects potentially associated with NK cell upregulation.<sup>33</sup> Additionally, the genetic data obtained in this study may not be universally applicable to different ethnic groups.

High variations in the KIR repertoire have been observed across various populations, including Chinese, White, and African groups, which could affect the magnitude of vaccine-related myocarditis susceptibility through KIR genetics.<sup>34–36</sup>

## STAR★METHODS

Detailed methods are provided in the online version of this paper and include the following:

- KEY RESOURCES TABLE
- RESOURCE AVAILABILITY
  - Lead contact
  - Materials availability
  - Data and code availability
- EXPERIMENTAL MODEL AND STUDY PARTICIPANT DETAILS
  - Recruited participants
  - Ethics
- METHOD DETAILS
  - Sample isolation
  - Pro-inflammatory cytokine measurement
  - Serum cardiac troponin T (cTnT) measurement
  - Immunophenotyping of PBMC
  - Genotyping
- QUANTIFICATION AND STATISTICAL ANALYSIS

## SUPPLEMENTAL INFORMATION

Supplemental information can be found online at <https://doi.org/10.1016/j.medj.2024.02.008>.

## ACKNOWLEDGMENTS

This work was supported by the Hong Kong Collaborative Research Fund (CRF) 2020/21 and the CRF Coronavirus and Novel Infectious Diseases Research Exercises (reference no. C7149-20G). The funding sources were not involved in the study design, data collection, analysis and interpretation, writing of the manuscript, or the decision to submit the manuscript for publication.

## AUTHOR CONTRIBUTIONS

H.W.T., M.Y.W.K., G.T.C., W.H.L., and P.I. contributed to the study conception and research design and had unrestricted access to all data. H.W.T., W.H.L., and P.I. contributed to the data interpretation and statistical analysis. S.S.L.T. and G.T.C. contributed to data collection and clinical analysis. H.W.T. prepared tables and figures and contributed to the first draft of the manuscript. M.Y.W.K., G.T.C., and J.S.C.W. contributed to subject recruitment. H.W.T. contributed to the sample preparation, processing, and experiments conducted in the study. All authors commented on, contributed to manuscript revisions of, and approved the final version of the article and take responsibility for its content.

## DECLARATION OF INTERESTS

The authors declare no competing interests.

Received: November 3, 2023

Revised: January 26, 2024

Accepted: February 26, 2024

Published: March 22, 2024

**REFERENCES**

- Zheng, C., Shao, W., Chen, X., Zhang, B., Wang, G., and Zhang, W. (2022). Real-world effectiveness of COVID-19 vaccines: a literature review and meta-analysis. *Int. J. Infect. Dis.* 114, 252–260.
- Heo, J.Y., Seo, Y.B., Kim, E.J., Lee, J., Kim, Y.R., Yoon, J.G., Noh, J.Y., Cheong, H.J., Kim, W.J., Yoon, S.Y., et al. (2022). COVID-19 vaccine type-dependent differences in immunogenicity and inflammatory response: BNT162b2 and ChAdOx1 nCoV-19. *Front. Immunol.* 13, 975363.
- Andrews, N., Stowe, J., Kirsebom, F., Toffa, S., Rickeard, T., Gallagher, E., Gower, C., Kall, M., Groves, N., O’Connell, A.M., et al. (2022). Covid-19 Vaccine Effectiveness against the Omicron (B.1.1.529) Variant. *N. Engl. J. Med.* 386, 1532–1546.
- Hippisley-Cox, J., Coupland, C.A., Mehta, N., Keogh, R.H., Diaz-Ordaz, K., Khunti, K., Lyons, R.A., Kee, F., Sheikh, A., Rahman, S., et al. (2021). Risk prediction of covid-19 related death and hospital admission in adults after covid-19 vaccination: national prospective cohort study. *BMJ* 374, n2244.
- Tenforde, M.W., Self, W.H., Adams, K., Gaglani, M., Ginde, A.A., McNeal, T., Ghamande, S., Douin, D.J., Talbot, H.K., Casey, J.D., et al. (2021). Association Between mRNA Vaccination and COVID-19 Hospitalization and Disease Severity. *JAMA* 326, 2043–2054.
- Salah, H.M., and Mehta, J.L. (2021). COVID-19 Vaccine and Myocarditis. *Am. J. Cardiol.* 157, 146–148.
- Li, X., Lai, F.T.T., Chua, G.T., Kwan, M.Y.W., Lau, Y.L., Ip, P., and Wong, I.C.K. (2022). Myocarditis Following COVID-19 BNT162b2 Vaccination Among Adolescents in Hong Kong. *JAMA Pediatr.* 176, 612–614.
- Carleton, B.C., Salmon, D.A., Ip, P., Wong, I.C.K., and Lai, F.T.T. (2023). Benefits v. risks of COVID-19 vaccination: an examination of vaccination policy impact on the occurrence of myocarditis and pericarditis. *Lancet Reg. Health. West. Pac.* 37, 100797.
- Chua, G.T., Kwan, M.Y.W., Chui, C.S.L., Smith, R.D., Cheung, E.C.L., Ma, T., Leung, M.T.Y., Tsao, S.S.L., Kan, E., Ng, W.K.C., et al. (2022). Epidemiology of Acute Myocarditis/Pericarditis in Hong Kong Adolescents Following Comirnaty Vaccination. *Clin. Infect. Dis.* 75, 673–681.
- Gargano, J.W., Wallace, M., Hadler, S.C., Langley, G., Su, J.R., Oster, M.E., Broder, K.R., Gee, J., Weintraub, E., Shimabukuro, T., et al. (2021). Use of mRNA COVID-19 Vaccine After Reports of Myocarditis Among Vaccine Recipients: Update from the Advisory Committee on Immunization Practices - United States, June 2021. *MMWR Morb. Mortal. Wkly. Rep.* 70, 977–982.
- Jara, L.J., Vera-Lastra, O., Mahroum, N., Pineda, C., and Shoenfeld, Y. (2022). Autoimmune post-COVID vaccine syndromes: does the spectrum of autoimmune/inflammatory syndrome expand? *Clin. Rheumatol.* 41, 1603–1609.
- Wiedermann, U., Garner-Spitzer, E., and Wagner, A. (2016). Primary vaccine failure to routine vaccines: Why and what to do? *Hum. Vaccines Immunother.* 12, 239–243.
- Arunachalam, P.S., Scott, M.K.D., Hagan, T., Li, C., Feng, Y., Wimmers, F., Grigoryan, L., Trisal, M., Edara, V.V., Lai, L., et al. (2021). Systems vaccinology of the BNT162b2 mRNA vaccine in humans. *Nature* 596, 410–416.
- Li, C., Lee, A., Grigoryan, L., Arunachalam, P.S., Scott, M.K.D., Trisal, M., Wimmers, F., Sanyal, M., Weidenbacher, P.A., Feng, Y., et al. (2022). Mechanisms of innate and adaptive immunity to the Pfizer-BioNTech BNT162b2 vaccine. *Nat. Immunol.* 23, 543–555.
- Zafarani, A., Razizadeh, M.H., Pashangzadeh, S., Amirzargar, M.R., Taghavi-Farahabadi, M., and Mahmoudi, M. (2023). Natural killer cells in COVID-19: from infection, to vaccination and therapy. *Future Virol.* 18, 177–191.
- Cooper, M.A., Fehniger, T.A., Ponnappan, A., Mehta, V., Wewers, M.D., and Caligiuri, M.A. (2001). Interleukin-1beta costimulates interferon-gamma production by human natural killer cells. *Eur. J. Immunol.* 31, 792–801.
- Madera, S., Rapp, M., Firth, M.A., Beilke, J.N., Lanier, L.L., and Sun, J.C. (2016). Type I IFN promotes NK cell expansion during viral infection by protecting NK cells against fratricide. *J. Exp. Med.* 213, 225–233.
- Poznanski, S.M., Lee, A.J., Nham, T., Lusty, E., Larché, M.J., Lee, D.A., and Ashkar, A.A. (2017). Combined Stimulation with Interleukin-18 and Interleukin-12 Potently Induces Interleukin-8 Production by Natural Killer Cells. *J. Innate Immun.* 9, 511–525.
- Korbel, D.S., Norman, P.J., Newman, K.C., Horowitz, A., Gendzekhadze, K., Parham, P., and Riley, E.M. (2009). Killer Ig-like receptor (KIR) genotype predicts the capacity of human KIR-positive CD56dim NK cells to respond to pathogen-associated signals. *J. Immunol.* 182, 6426–6434.
- Gilchrist, J.J., Makino, S., Naranbhai, V., Sharma, P.K., Koturan, S., Tong, O., Taylor, C.A., Watson, R.A., de Los Aires, A.V., Cooper, R., et al. (2022). Natural Killer cells demonstrate distinct eQTL and transcriptome-wide disease associations, highlighting their role in autoimmunity. *Nat. Commun.* 13, 4073.
- Cuapio, A., Boulouis, C., Filipovic, I., Wullimann, D., Kammann, T., Parrot, T., Chen, P., Akber, M., Gao, Y., Hammer, Q., et al. (2022). NK cell frequencies, function and correlates to vaccine outcome in BNT162b2 mRNA anti-SARS-CoV-2 vaccinated healthy and immunocompromised individuals. *Mol. Med.* 28, 20.
- Benda, M., Mutschlechner, B., Ulmer, H., Grabher, C., Severgnini, L., Volgger, A., Reimann, P., Lang, T., Atzl, M., Huynh, M., et al. (2021). Serological SARS-CoV-2 antibody response, potential predictive markers and safety of BNT162b2 mRNA COVID-19 vaccine in haematological and oncological patients. *Br. J. Haematol.* 195, 523–531.
- Won, T., Gilotra, N.A., Wood, M.K., Hughes, D.M., Talor, M.V., Lovell, J., Milstone, A.M., Steenbergen, C., and Čiháková, D. (2022). Increased Interleukin 18-Dependent Immune Responses Are Associated With Myopericarditis After COVID-19 mRNA Vaccination. *Front. Immunol.* 13, 851620.
- Parham, P. (2005). MHC class I molecules and KIRs in human history, health and survival. *Nat. Rev. Immunol.* 5, 201–214.
- Hsu, K.C., Liu, X.R., Selvakumar, A., Mickelson, E., O’Reilly, R.J., and Dupont, B. (2002). Killer Ig-like receptor haplotype analysis by gene content: evidence for genomic diversity with a minimum of six basic framework haplotypes, each with multiple subsets. *J. Immunol.* 169, 5118–5129.
- Huang, Z., Fu, B., Zheng, S.G., Li, X., Sun, R., Tian, Z., and Wei, H. (2011). Involvement of CD226+ NK cells in immunopathogenesis of systemic lupus erythematosus. *J. Immunol.* 186, 3421–3431.
- Tong, X., Ru, Y., Fu, J., Wang, Y., Zhu, J., Ding, Y., Lv, F., Yang, M., Wei, X., Liu, C., et al. (2022). Fucosylation Promotes Cytolytic Function and Accumulation of NK Cells in B Cell Lymphoma. *Front. Immunol.* 13, 904693.
- Du, Y., Shen, L.X., Yu, L.K., Song, Y., Zhu, J.F., and Du, R. (2012). The CD226 gene in susceptibility of rheumatoid arthritis in the Chinese Han population. *Rheumatol. Int.* 32, 1299–1304.
- Oertelt-Prigione, S. (2012). The influence of sex and gender on the immune response. *Autoimmun. Rev.* 11, A479–A485.
- Zientarska, A., Mikula-Pietrasik, J., Kaczmarek, M., Witkowska, A., Rozpochowski, B., Kowala-Piaskowska, A., Książek, K., Żeromski, J., and Mozer-Lisewska, I. (2021). Gender as a factor affecting NK cell activity in patients successfully treated for chronic hepatitis C with direct-acting antivirals. *Cep. Eur. J. Immunol.* 46, 481–491.
- Yovel, G., Shakhar, K., and Ben-Eliyahu, S. (2001). The effects of sex, menstrual cycle, and oral contraceptives on the number and activity of natural killer cells. *Gynecol. Oncol.* 81, 254–262.
- Phan, M.T., Chun, S., Kim, S.H., Ali, A.K., Lee, S.H., Kim, S., Kim, S.H., and Cho, D. (2017). Natural killer cell subsets and receptor expression in peripheral blood mononuclear cells of a healthy Korean population: Reference range, influence of age and sex, and correlation between NK cell receptors and cytotoxicity. *Hum. Immunol.* 78, 103–112.
- Syenina, A., Gan, E.S., Toh, J.Z.N., de Alwis, R., Lin, L.Z., Tham, C.Y.L., Yee, J.X., Leong, Y.S., Sam, H., Cheong, C., et al. (2022). Adverse effects following anti-COVID-19 vaccination with mRNA-based BNT162b2 are alleviated by altering the route of administration and correlate with baseline enrichment of T and NK cell genes. *PLoS Biol.* 20, e3001643.
- Braun, K., Larcombe, L., Orr, P., Nickerson, P., Wolfe, J., and Sharma, M. (2013). Killer immunoglobulin-like receptor (KIR) centromeric-AA haplotype is associated with ethnicity and tuberculosis disease in a

- Canadian First Nations cohort. *PLoS One* 8, e67842.
35. Lee, Y.C., Chan, S.H., and Ren, E.C. (2008). Asian population frequencies and haplotype distribution of killer cell immunoglobulin-like receptor (KIR) genes among Chinese, Malay, and Indian in Singapore. *Immunogenetics* 60, 645–654.
36. Norman, P.J., Carrington, C.V.F., Byng, M., Maxwell, L.D., Curran, M.D., Stephens, H.A.F., Chandanayingyong, D., Verity, D.H., Hameed, K., Ramdath, D.D., and Vaughan, R.W. (2002). Natural killer cell immunoglobulin-like receptor (KIR) locus profiles in African and South Asian populations. *Gene Immun.* 3, 86–95.
37. Sexson Tejtel, S.K., Munoz, F.M., Al-Ammouri, I., Savorgnan, F., Guggilla, R.K., Khuri-Bulos, N., Phillips, L., and Engler, R.J.M. (2022). Myocarditis and pericarditis: Case definition and guidelines for data collection, analysis, and presentation of immunization safety data. *Vaccine* 40, 1499–1511.
38. Ferreira, V.M., Schulz-Menger, J., Holmvang, G., Kramer, C.M., Carbone, I., Sechtem, U., Kindermann, I., Gutberlet, M., Cooper, L.T., Liu, P., and Friedrich, M.G. (2018). Cardiovascular Magnetic Resonance in Nonischemic Myocardial Inflammation: Expert Recommendations. *J. Am. Coll. Cardiol.* 72, 3158–3176.
39. Tsang, H.W., Chua, G.T., To, K.K.W., Wong, J.S.C., Tu, W., Kwok, J.S.Y., Wong, W.H.S., Wang, X., Zhang, Y., Rosa Duque, J.S., et al. (2021). Assessment of SARS-CoV-2 Immunity in Convalescent Children and Adolescents. *Front. Immunol.* 12, 797919.
40. Sullivan, G.M., and Feinn, R. (2012). Using Effect Size-or Why the P Value Is Not Enough. *J. Grad. Med. Educ.* 4, 279–282.

## STAR★METHODS

### KEY RESOURCES TABLE

| REAGENT or RESOURCE                               | SOURCE                  | IDENTIFIER                                                                                                                    |
|---------------------------------------------------|-------------------------|-------------------------------------------------------------------------------------------------------------------------------|
| <b>Antibodies</b>                                 |                         |                                                                                                                               |
| Pacific Blue anti-human CD3 clone HIT3a           | BioLegend               | Cat#300330                                                                                                                    |
| APC anti-human CD56 clone 5.1H11                  | BioLegend               | Cat#362504                                                                                                                    |
| APC/Cyanine 7 anti-human CD14 clone M5E2          | BioLegend               | Cat#301820                                                                                                                    |
| FITC anti-human CD69 clone FN50                   | BioLegend               | Cat#310904                                                                                                                    |
| PerCP/Cyanine5.5 anti-human CD57 clone HNK-1      | BioLegend               | Cat#359622                                                                                                                    |
| PE anti-human HLA-DR clone LN3                    | BioLegend               | Cat#327008                                                                                                                    |
| <b>Biological samples</b>                         |                         |                                                                                                                               |
| Human Serum                                       | This study              | N/A                                                                                                                           |
| Isolated Peripheral Blood Monocytic Cells (PBMCs) | This study              | N/A                                                                                                                           |
| <b>Critical commercial assays</b>                 |                         |                                                                                                                               |
| LEGENDplex™ Human Inflammation Panel 1            | BioLegend               | Cat#740809                                                                                                                    |
| Human Cardiac Troponin T ELISA Kit                | Abcam                   | Cat#ab223860                                                                                                                  |
| Viability™ 405/520 Fixable Dyes                   | Miltenyi Biotechnology  | Cat#130-130-404                                                                                                               |
| KIR Typing Kit                                    | Miltenyi Biotechnology  | Cat#130-092-584                                                                                                               |
| Taqman-based SNP assay for rs1788098              | ThermoFisher Scientific | Cat#4351379, Assay#C__27129661_10                                                                                             |
| Taqman-based SNP assay for rs11000765             | ThermoFisher Scientific | Cat# 4351379, Assay#C__31474461_10                                                                                            |
| Taqman-based SNP assay for rs7669821              | ThermoFisher Scientific | Cat#4351379, Assay#C__11300754_10                                                                                             |
| Taqman-based SNP assay for rs1363974              | ThermoFisher Scientific | Cat#4351379, Assay #C__7602713_20                                                                                             |
| Taqman-based SNP assay for rs1866140              | ThermoFisher Scientific | Cat#4351379, Assay #C__3227280_1_                                                                                             |
| <b>Software and algorithms</b>                    |                         |                                                                                                                               |
| FlowJo ver 10.1                                   | BD Biosciences          | <a href="https://www.flowjo.com/">https://www.flowjo.com/</a>                                                                 |
| LEGENDplex™ data analysis software suite          | BioLegend               | <a href="https://www.biolegend.com/fr-fr/immunoassays/legendplex">https://www.biolegend.com/fr-fr/immunoassays/legendplex</a> |
| SPSS for Windows ver. 27.0                        | SPSS Inc                | <a href="https://www.ibm.com/products/spss-statistics">https://www.ibm.com/products/spss-statistics</a>                       |
| Prism for Windows version 8.0.1                   | GraphPad Software       | <a href="https://www.graphpad.com/features">https://www.graphpad.com/features</a>                                             |

## RESOURCE AVAILABILITY

### Lead contact

Further information and requests for resources and reagents should be directed to and will be fulfilled by the lead contact, Patrick Ip ([patricip@hku.hk](mailto:patricip@hku.hk)).

### Materials availability

This study did not generate new unique reagents.

### Data and code availability

Data reported in this paper will be shared by the [lead contact](#) upon request. This paper does not report original code. Any additional information required to reanalyze the data reported in this paper is available from the [lead contact](#) upon request.

## EXPERIMENTAL MODEL AND STUDY PARTICIPANT DETAILS

### Recruited participants

Individuals receiving mRNA COVID-19 vaccine consented and agreed to link their corresponding electronic health records in Hospital Authority (HA) to their vaccination records through the CARE program. Participants information on age, sex, and ethnicity was self-reported. Individuals aged between 12 and 17 years with suspected post-vaccine acute myocarditis who had received the 1<sup>st</sup>, 2<sup>nd</sup>, or 3<sup>rd</sup> dose of mRNA COVID-19 vaccine within 14 days prior to admission to one of the Hong

Kong Hospital Authority (HA) hospitals were recruited to this study. Serum levels of cardiac troponin T, electrocardiograms (ECGs), and echocardiograms were serially monitored for the admitted patients. ECGs were interpreted by a single investigator (S.S.T.), while echocardiograms were performed and analyzed by cardiologists at the admitting hospital. The study team followed the criteria suggested by the Brighton Collaboration Case Definition of Myocarditis and Pericarditis to confirm cases of myocarditis and they were managed by clinicians according to the Hong Kong Pediatrics Investigation Protocol for Comirnaty-related Myocarditis/Pericarditis during their hospital stay.<sup>37</sup> Cardiac magnetic resonance imaging (cMRI) was conducted to the confirmed cases upon hospital admission or at the Hong Kong Children's Hospital within two weeks of symptom onset. Radiologists in the MRI unit interpreted the images by Lake Louise Myocarditis Criteria 2018.<sup>38</sup> Age-matched individuals who received the mRNA COVID-19 vaccine within a similar time frame and were admitted to HA hospitals with suspected acute myocarditis that was later confirmed not to be acute myocarditis according to Brighton Collaboration Case Definition of Myocarditis and Pericarditis were included in the study as normal vaccination response controls (Table S1). Median age-matched healthy non-vaccinated controls were also included in the study as the baseline controls. Patients and control cases were excluded if they tested positive for SARS-CoV-2 by RT-PCR, had a history of COVID-19 infection by testing positive for anti-receptor binding domain (RBD) and anti-nucleocapsid protein (NP), common respiratory virus, adenovirus, human metapneumovirus or respiratory syncytial virus by nasopharyngeal swab, or enterovirus by throat and rectal swab.

### Ethics

This study was approved by the Institutional Review Board of the University of Hong Kong/Hospital Authority Hong Kong West Cluster (Reference: UW20-292, UW21-149, UW21-157 and UW-21-548), the Kowloon West Cluster Research Ethics Committee [Reference: KW/FR-20-086(148-10)] and the Department of Health Ethics Committee (Reference: LM21/2021). Written consent was obtained from parents or legal guardians of the participants.

## METHOD DETAILS

### Sample isolation

Peripheral blood was collected during the patient's hospital stay and from non-vaccinated control blood was collected during recruitment. Plasma and serum samples were recovered by centrifugation and aliquots were stored at  $-80^{\circ}\text{C}$ . PBMCs were isolated from heparinized whole blood samples by the gradient density centrifugation method and recovered in batches for the subsequent experiments.<sup>39</sup>

### Pro-inflammatory cytokine measurement

Serum levels of pro-inflammatory cytokines were measured using LEGENDplex (Biolegend, San Diego, CA), a pre-designed bead-based immunoassay panel targeting 13 pro-inflammatory cytokines (IL-1 $\beta$ , IFN- $\alpha$ 2, IFN- $\gamma$ , TNF- $\alpha$ , MCP-1, IL-6, IL-8, IL-10, IL-12p70, IL-17A, IL-18, IL-23, and IL-33). The fluorescence intensity was captured by a BD LSR-II flow cytometer (BD Bioscience, San Jose, CA) and the analyte concentration was estimated from a standard curve generated in the same experiment.

### Serum cardiac troponin T (cTnT) measurement

The concentration of circulating cTnT in serum samples from vaccinated patients and controls was measured by Human Cardiac Troponin ELISA Kit (Abcam, Cambridge, UK) according to the manufacturer's protocol.



### Immunophenotyping of PBMC

The PBMCs were recovered in batches as above. Dead cells were stained with VioGreen dye (Miltenyi Biotechnology, Germany) before fixation for further analysis. Cells were fixed and permeabilized and stained with an antibody cocktail containing Pacific Blue anti-human CD3 (Clone no.: HIT3a, Biolegend), APC anti-human CD56 (Clone no.:5.1H11, Biolegend), and APC/Cyanine 7 anti-human CD14 (Clone no.:M5E2, Biolegend) for the identification of T cells, NK cells, and monocytes, respectively; and FITC anti-human CD69 (Clone no.: FN50, Biolegend), PerCP/Cyanine5.5 anti-human CD57 (Clone no.: HNK-1, Biolegend), and PE anti-human HLA-DR (Clone no.: LN3, Biolegend) for the corresponding activation analyses. Hundred thousand events were analyzed by a BD LSR-II flow cytometer (BD Biosciences). The gating applied in the quantification of selected immune cells is illustrated in [Figure S1](#).

### Genotyping

Genomic DNA was extracted from whole blood samples using QIAamp DNA Mini Kit (QIAGEN, Venlo, Netherlands). The KIR gene content was captured by KIR Typing Kit (Miltenyi Biotechnology, Germany) according to the manufacturer's protocol. The KIR gene identification method is illustrated in [Figure S2](#). Five common genetic variants, rs1788098, rs11000765, rs7669821, rs1363974 and rs1866140, which are significantly associated with autoimmune diseases, were found to regulate the expression of corresponding genes in NK cell cytotoxicity.<sup>20</sup> We performed genotyping to investigate their association with the cardiac complications in mRNA COVID-19-vaccinated adolescent patients. Genotyping was performed by Taqman-based SNP assay (ThermoFisher Scientific, Waltham, MA) according to the manufacturer's protocol.

### QUANTIFICATION AND STATISTICAL ANALYSIS

Flow cytometry analysis was performed using FlowJo (version 10.1, BD Biosciences) and LEGENDplex data analysis software suite (version 2023-02-15, Biolegend). Statistical analyses were performed using SPSS for Windows (version 27.0, SPSS Inc, Chicago, IL) and Prism for Windows (version 8.0.1, GraphPad Software, San Diego, CA). Data were expressed as mean  $\pm$  standard deviation (SD). Statistical details are provided in the respective figure legends. Comparison analyses were carried out by two-tailed Student's *t* test with  $p < 0.05$  considered statistically significant. The effect size comparison of the selected cellular responses between patients after different doses of mRNA-COVID-19 vaccination and cTnT concentration in patients carrying rs1788098 and rs11000765 was assessed by Cohen's *d*.<sup>40</sup>

The inflammatory status and cellular response in acute myocarditis patients who received mRNA COVID-19 vaccination were assessed by pro-inflammatory cytokine levels and were compared with non-vaccinated and vaccinated control groups. The immune profile of patients was investigated by quantifying specific activation markers HLA-DR, CD57 and CD69 in monocytes, NK cells, and T cells, respectively, and were compared with the vaccinated control group. To analyze the relationship between cardiac damage marker cTnT and the acute cellular response in patients after mRNA COVID-19 vaccination, we performed Pearson's correlations analysis and expressed the results as correlation coefficient (*r*) with  $p < 0.05$  considered statistically significant. Odds ratio was employed to predict the risk of KIR gene carriers in developing post-mRNA COVID-19 acute myocarditis. Linear or multiple regression analysis was performed in association with the genotypes from each investigated polymorphism and cTnT level measured in the patient groups. The likelihood of the correlation was assessed by the correlation coefficient (*r*) and *p* value in the association analysis.

**Med, Volume 5**

**Supplemental information**

**The central role of natural killer cells  
in mediating acute myocarditis  
after mRNA COVID-19 vaccination**

**Hing Wai Tsang, Mike Yat Wah Kwan, Gilbert T. Chua, Sabrina Siu Ling Tsao, Joshua Sung Chih Wong, Keith Tsz Suen Tung, Godfrey Chi Fung Chan, Kelvin Kai Wang To, Ian Chi Kei Wong, Wing Hang Leung, and Patrick Ip**

**Table S1. Other medical conditions in the vaccinated controls, related to Study Participants in Star Method**

| Control Medical Condition |                                                        |
|---------------------------|--------------------------------------------------------|
| Control 1                 | Post-vaccination bullous eruption                      |
| Control 2                 | Non-specific chest pain                                |
| Control 3                 | Post-vaccination left facial nerve palsy; Bell's palsy |
| Control 4                 | Post-vaccination fever                                 |
| Control 5                 | Post-vaccination vestibular neuronitis                 |
| Control 6                 | Non-specific chest pain                                |
| Control 7                 | Microcytic anemia/unstable emotions                    |
| Control 8                 | Non-specific chest pain                                |
| Control 9                 | Non-specific chest pain                                |
| Control 10                | Supraventricular tachycardia                           |

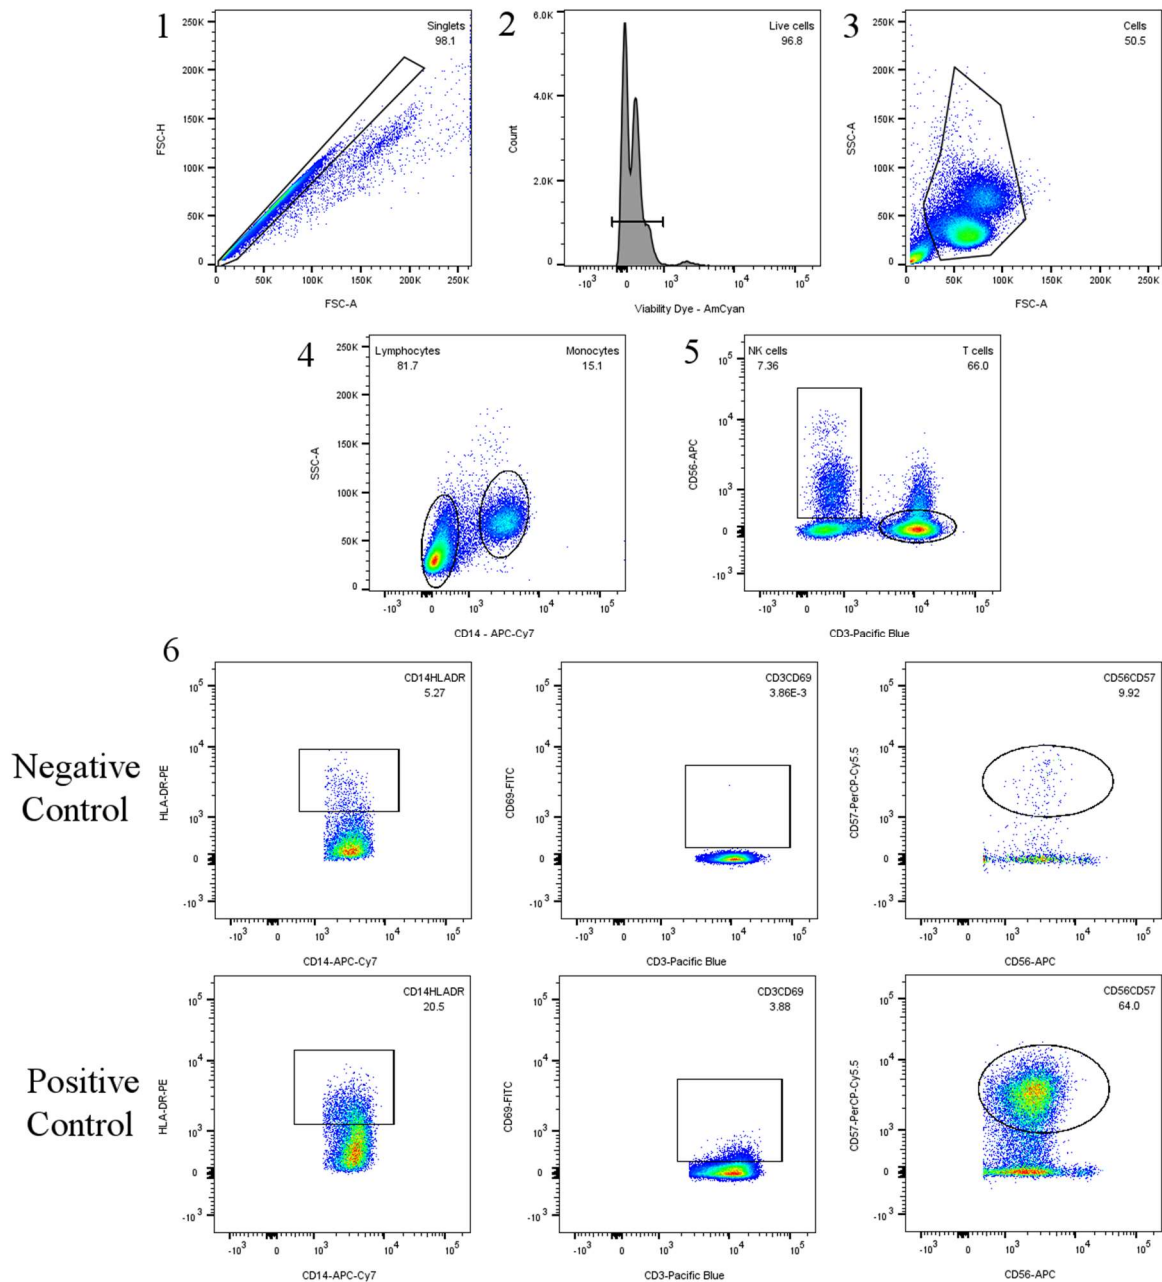

**Figure S1. Representative gating analysis by flow cytometry, related to immunophenotyping in Star Method.** **1.** Forward scatter height (FSC-H) versus forward scatter area (FSC-A) plot for single cell inclusion. **2.** Live cells were gated based on live/dead discrimination dye staining. **3.** Side scatter area (SSC-A) versus forward scatter area (FSC-A) plot for lymphocyte and monocyte identification. **4.** Monocytes were gated based on specific high CD14 expression on the SSC-A versus CD14 plot, excluding the lymphocyte populations. **5.** NK cells and T cells were gated from the specific high expression of CD56 and CD3 from the gated lymphocyte population. **6.** Floating gate on HLA-DR, CD57, and CD69 on the corresponding CD14 Monocytes, CD56 NK cells, and CD3 T cells were identified and quantified based on the corresponding expression gating on the positive control cells.

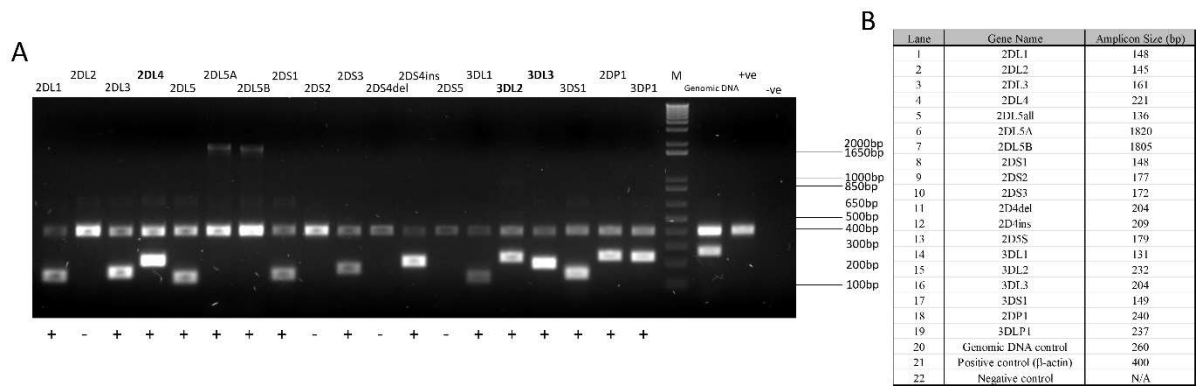

**Figure S2. Representative KIR typing analysis in the vaccinated controls and acute myocarditis patients, related to genotyping in Star Method.** A. Gel electrophoresis displaying the targeted KIR PCR product in a representative sample. B. Visualization of the anticipated amplicon sizes for various KIR genes through gel electrophoresis.
